# Supplementary material
Source: PubMed Central journal article supplement (PMC4813757)
Supplement: NIHMS67548-supplement-supplementary_data.pdf [file NIHMS67548-supplement-supplementary_data.pdf]

## Supplementary Material

### Supplementary figure 1

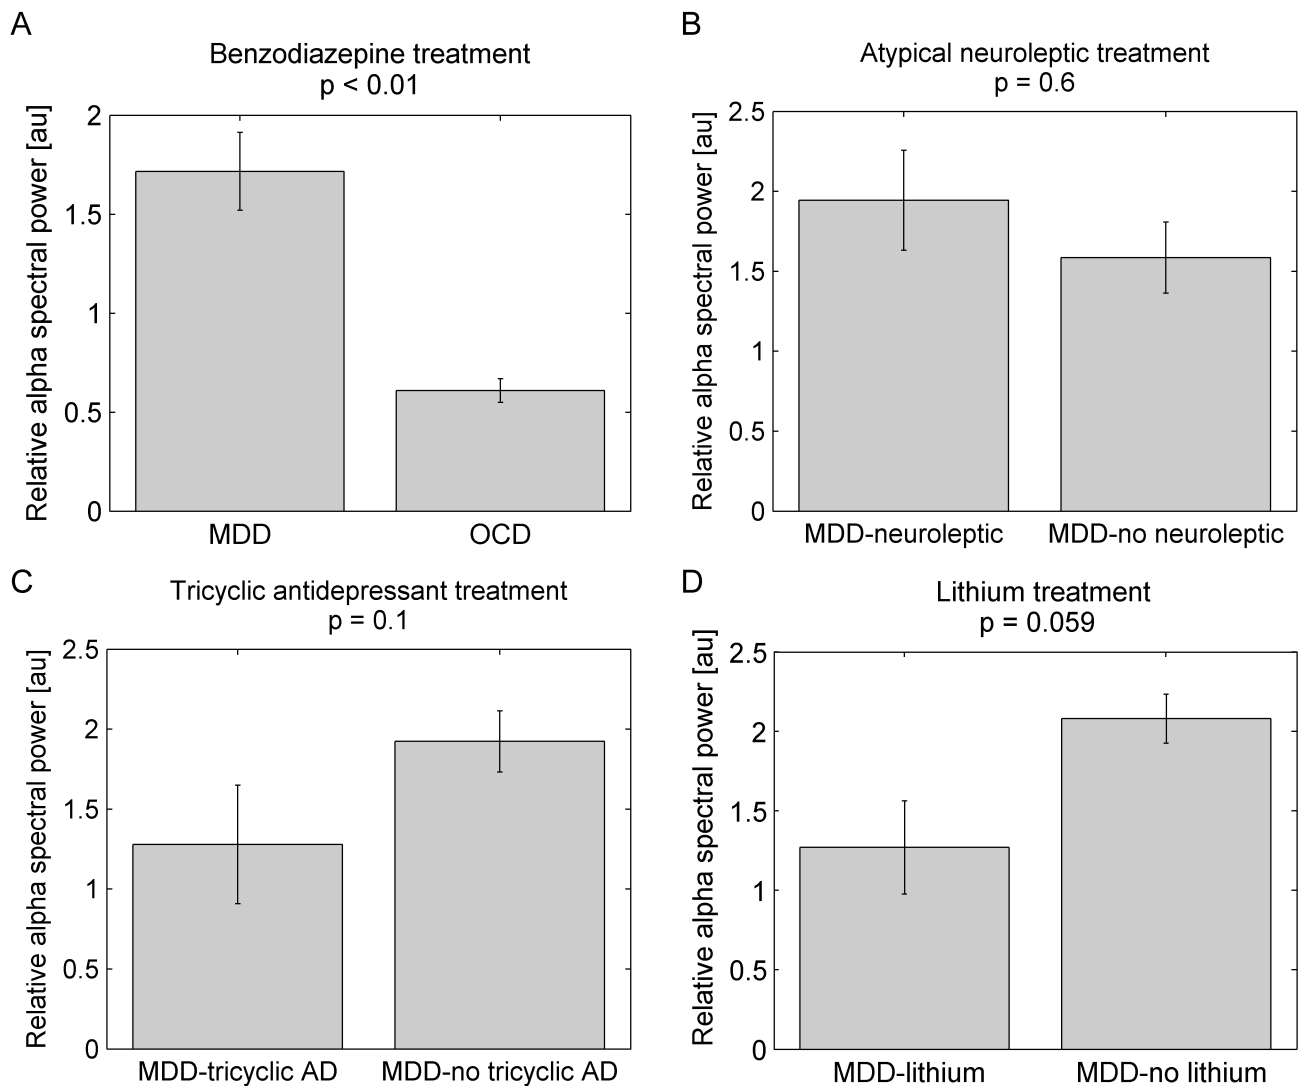

Comparison of drug related differences on the power-spectra revealed no systematic effects that could explain the difference in alpha power between OCD and MDD patients. All OCD patients were on benzodiazepine treatment and therefore compared to the 5 MDD patients that were using benzodiazepines (A). Consistent with our main finding, alpha power was larger in MDD compared to OCD (A). Within group comparison for atypical neuroleptics (B), tricyclic antidepressants (C) and Lithium (D) did not reveal significant differences within the MDD group.
